1 **Title:** Spontaneous variability predicts adaptive motor response in vocal pitch control

2

3 **Running title:** Variability predicts adaptation in vocal pitch control

4

5 **Author**

6 Ryosuke O. Tachibana (1,2) \*

7 Mingdi Xu (3)

8 Ryu-ichiro Hashimoto (4,5)

9 Fumitaka Homae (4,5)

10 Kazuo Okanoya (1,2,6)

11 \* ... corresponding author

12 **Affiliation**

13 1) Center for Evolutionary Cognitive Sciences, The University of Tokyo, Tokyo, Japan

14 2) Department of Life Sciences, Graduate School of Arts and Sciences, The University of Tokyo, Tokyo,  
15 Japan

16 3) Department of Psychology, Faculty of Letters, Keio University, Yokohama, Japan

17 4) Department of Language Sciences, Graduate School of Humanities, Tokyo Metropolitan University,  
18 Tokyo, Japan

19 5) Research Center for Language, Brain and Genetics, Tokyo Metropolitan University, Tokyo, Japan

20 6) RIKEN Center for Brain Science, Saitama, Japan

21

22 **Keywords**

23 auditory feedback, pitch shift, real-time process, motor exploration, compensation

24

25 **Significance statement**

26 We regulate our own vocalization by hearing own voice. This fact is typically observed as canceling-out  
27 (compensatory) responses in vocalized pitch when artificial pitch shifts were induced in the auditory feedback  
28 of own voice. Interestingly, the amount of such compensation widely ranges among talkers from perfect  
29 cancellation to almost nothing. Here we demonstrated that participants who spontaneously exhibited larger  
30 fluctuations showed greater amounts of the compensation against feedbacked pitch shifts. Our in-depth  
31 analyses showed that slowly fluctuating components in spontaneous pitch variability are specifically  
32 correlated with the compensation ratios, and was shared in the compensatory response as a dominant  
33 component. These findings support the idea that such variability contributes to generating motor explorations  
34 to find better outcomes in motor controls.

35

36 **Abstract**

37 Our motor system uses sensory feedback to keep behavioral performance in desired status. From this view,  
38 motor fluctuation is not simply ‘noise’ inevitably caused in the nervous system, but should provide a role in  
39 generating variations to explore better outcomes via their sensory feedback. Vocal control system offers a  
40 good model to investigate such adaptive sensory-motor interactions. The pitch, or fundamental frequency (FF),  
41 of voice is adaptively regulated by hearing its auditory feedback to compensate FF deviations. Animal studies,  
42 particularly for songbirds, have demonstrated that the variability in vocal features contributes to the adaptive  
43 control, although the same issue in human vocalizations has remained unclear. Here, we tested whether and  
44 how the motor variability contributes to adaptive control of vocal FF in humans. We measured the amount of  
45 compensatory vocal responses against FF shifts in the auditory feedback, and quantified the motor variability  
46 as amplitudes of spontaneous FF fluctuations during no shift vocalizations. The result showed a positive  
47 correlation between the ratio of compensation and the spontaneous vocal variability. Further analysis indicated  
48 that this correlation was due to slowly fluctuating components (<5 Hz) of the variability, but not fast  
49 fluctuations (6-30 Hz), which is likely to reflect controllability from the central nervous system. Moreover, the  
50 compensatory responses consisted of the same frequency range with the slow component in the spontaneous  
51 variability. These findings consistently demonstrated that the spontaneous motor variability predicts the  
52 adaptive control in vocal FF, supporting the motor exploration hypothesis.

53

54

## 55 **Introduction**

56 Precise control of vocal pitch, or fundamental frequency (FF), is essential for human communication since the  
57 vocal FF is a dominant cue for prosodies in speaking, or melodies in singing. A key aspect of the vocal control  
58 is hearing own voice, or the auditory feedback. Speakers regulate their own vocal FF by canceling out subtle  
59 FF deviations induced in the auditory feedback (Elman, 1981; Kawahara, 1994; Burnett et al., 1998; Larson et  
60 al., 2000). For example, shifting up vocal FF in the auditory feedback elicits a response shifting down FF in  
61 the vocalization. Such compensatory vocal response does not always cancel out the shift completely, but  
62 rather remains around half or less of the induced shift with large individual differences (Hain et al., 2000; Liu  
63 and Larson, 2007; Liu et al., 2010; Scheerer and Jones, 2012). Investigating mechanisms underlying the  
64 compensatory responses for vocal FF regulation provides opportunities to understand the adaptive audio-vocal  
65 system, which plays a critical role in our vocal control.

66 Recent studies in animal vocalizations, particularly in birdsongs, have suggested that variability in vocal  
67 features contributes to vocal adaptation against errors induced in the auditory feedback (Tumer and Brainard,  
68 2007; Sober and Brainard, 2012; Kuebrich and Sober, 2015; Woolley and Kao, 2015; Tachibana et al., 2017).  
69 Songbirds typically vocalize stereotypic songs in adulthood that have almost identical acoustical patterns  
70 across renditions, while exhibiting slight but unignorable variations in their acoustical features such as FF.  
71 These variations have been reported to contribute to maintaining the song quality (Kao et al., 2005; Tumer and  
72 Brainard, 2007; Charlesworth et al., 2011). In particular, the FF shifts in the auditory feedback elicit  
73 compensative responses of vocal FFs in birds' song syllables (Sober and Brainard, 2009). The amount of this  
74 compensation became larger when distributions of original and shifted FF variations are more overlapped  
75 (Sober and Brainard, 2012; Kuebrich and Sober, 2015), linking the wider variability with the greater vocal  
76 adaptations. It has also been shown that temporal patterns of FF fluctuation within a brief sound element guide  
77 to keep and improve the song quality (Charlesworth et al., 2011; Kojima et al., 2018). Intriguingly, the vocal  
78 variability in birdsongs is not simply due to the intrinsic noise in the peripheral motor system, but a certain  
79 amount of them is 'actively' generated by a dedicated circuit that is required for song learning (Kao and  
80 Brainard, 2006; Hampton et al., 2009; Olveczky and Gardner, 2011; Kojima et al., 2018). These findings in  
81 songbirds' vocalization have supported the idea that motor variations contribute to adaptive controls by  
82 generating the motor exploration (Wu et al., 2014; Woolley and Kao, 2015; Dhawale et al., 2017). Moreover,  
83 the active generation of variability in the motor processes is likely to suit to the adaptation-related motor  
84 exploration (Dhawale et al., 2017). Such mechanism for songbirds' vocal control could be shared with humans  
85 (Hahnloser and Narula, 2017), especially when taking into account behavioral and neural parallels between  
86 these two species for vocalization development (Doupe and Kuhl, 1999; Kuhl, 2004; Lipkind et al., 2013;  
87 Tchernichovski and Marcus, 2014; Prather et al., 2017).

88 In contrast, relationships between variability and adaptability in human vocal control have not been well

89 documented. Variability in the human vocal FF appears to consist of several components reflecting different  
90 sources or mechanisms. These components have been classified according to their dominant frequencies in the  
91 modulation spectrum, which is an amplitude spectrum of FF changing frequency (modulation frequency). For  
92 example, a quasi-periodic FF fluctuation during singing (or *vibrato*) has been reported to show a peak around  
93 4–7 Hz on the modulation spectrum, with greater stability in trained singers (Sundberg, 1987; Shipp et al.,  
94 1988; Howes et al., 2004). In contrast, non-periodic components at relatively higher modulation frequencies at  
95 10–20 Hz, or fine fluctuation (Akagi et al., 1998; Akagi and Kitakaze, 2000; Saitou et al., 2005), have been  
96 reported to be involved in the perception of voice quality both in speaking (Akagi et al., 1998) and singing  
97 (Akagi and Kitakaze, 2000). Such aperiodic fast fluctuation is likely due to the physiological instability of  
98 peripheral vocal organs (Schoentgen, 2002), and hence, is less or not controllable for the central nervous  
99 system. These reports lead to a question of whether and to what extent these different types of variability  
100 could contribute to the vocal regulation.

101 Here, we assessed associations between vocal compensatory responses against auditory feedback  
102 modifications and variabilities of different components in vocal FF trajectories to obtain a better  
103 understanding of how we accomplish adaptive vocal regulations based on the auditory feedback. In the  
104 experiment, the vocal FF in the auditory feedback was modified while participants were vocalizing, and the  
105 rate of compensation in their vocalized FF was measured. We quantified the vocal variability that was  
106 spontaneously generated in vocalizations for unmodified feedback after separating the variability components  
107 into different modulation frequency bands. By correlation analyses between the variability and the  
108 compensation ratio, we found a greater correlation in slowly fluctuating components than fast fluctuations that  
109 are likely to be less controllable in the central nervous system. Further analysis showed that the compensatory  
110 response consists of the frequency range of the slow component in the spontaneous fluctuation. These results  
111 consistently support the hypothesis that the spontaneous variability subserves motor explorations to enhance  
112 the compensatory response against perturbations in the auditory feedback.

113

## 114 **Results**

### 115 Variety of the compensation ratio across participants

116 In the experiment, participants were asked to continuously produce isolated vowels for two seconds twice  
117 while listening to auditory feedback via headphones, and only the second voice was modified in its feedback  
118 (**Fig. 1A**; see Methods for detail). We found a clear tendency of compensation (canceling out) in vocalized FF  
119 against the artificially induced FF shifts in auditory feedback (**Fig. 1B**). The amount of compensation was  
120 almost proportional to the amount of seven FF shift conditions (0,  $\pm 25$ ,  $\pm 50$ , or  $\pm 100$  cents), as already shown  
121 in the previous study (Xu et al., 2020). Thus, we defined the compensation ratio for an individual participant  
122 as a sign-inverted slope of a fitted line to compensation amounts as a function of introduced FF shifts (**Fig.**

123 **1C**). The obtained compensation ratio was variable across participants with ranging from  $-0.13$  to  $0.82$   
124 ( $0.39 \pm 0.21$  [mean  $\pm$  SD]; **Fig. 1D**).

125

### 126 Variability in slow component of spontaneous fluctuations correlated with the compensation ratio

127 To assess what extent the motor variability related to the adaptation, we performed correlation analyses  
128 between the compensation ratio and several types of FF variability. Note that we only included participants  
129 who showed compensatory responses (i.e., positive value in the compensation ratio), resulted in excluding two  
130 out of forty participants from further analysis. To quantify vocal variability that was spontaneously generated  
131 without external perturbations, we calculated the standard deviation (SD) of an original FF trajectory of the  
132 first vocalization (no FF shift presented) in each trial. The mean of all SDs was defined as the variability of  
133 whole frequency components (“whole”). This variability ranged from  $8.55$  to  $23.87$  ( $14.19 \pm 3.72$ ) cents. We  
134 found the whole variability was significantly correlated with the compensation ratio (**Fig. 2A**; Spearman’s  
135 correlation coefficient  $r_s = 0.40$ , sample size  $n = 38$ ,  $p = 0.014$ ). Then, we aimed to divide the whole  
136 variability into slow or fast fluctuating components according to the modulation spectrum of the spontaneous  
137 FF fluctuation that was calculated by the 1/2-octave-band filter-bank method. The obtained modulation  
138 spectrum (**Fig. 2B**) showed apparent two peaks at modulation frequencies of  $2\text{--}3$  Hz and  $6\text{--}10$  Hz, suggesting  
139 two different variability components. None of the participants exhibited a sharp peak around  $4\text{--}7$  Hz  
140 corresponding to the presence of the vibrato component (Sundberg, 1987; Shipp et al., 1988; Howes et al.,  
141 2004). Thus, we defined slowly and rapidly changing components, termed as “slow” and “fast” fluctuations  
142 with having modulation frequency ranges of less than  $5$  Hz and  $6\text{--}30$  Hz, respectively (**Fig. 2C**). Obtained  
143 variabilities of slow and fluctuation components were ranged  $7.99\text{--}22.52$  ( $13.07 \pm 3.72$ ) and  $-2.04\text{--}6.93$  ( $3.50$   
144  $\pm 3.72$ ) cents, respectively.

145 The correlation analysis between these variabilities and the compensation ratio resulted in that the slow  
146 component showed a significant correlation (**Fig. 2D**;  $r_s = 0.42$ ,  $n = 38$ ,  $p = 0.009$ ), whereas the fast  
147 component did not (**Fig. 2E**;  $r_s = 0.18$ ,  $n = 38$ ,  $p = 0.282$ ). In addition to this result, the same tendency was  
148 observed in different vowels (see **Supporting Information**), providing further support for the finding that the  
149 larger slow component predicts the greater compensation. Moreover, to confirm the relative impact of each  
150 modulation frequency band on the compensation, we calculated the correlation coefficients between  
151 compensation ratios and variability values in each of the subbands which were derived from the modulation  
152 spectrum analysis. This analysis showed the consistent result (**Fig. 2F**) that the slow component (less than  
153  $4$  Hz in modulation frequency) exhibited a greater correlation with the compensation ratio, but the rapid one  
154 (higher than  $5$  Hz) did not.

155

### 156 Increase of slow component in compensatory response

157 To assess which frequency component in the FF trajectory the participants used to compensate for the FF

158 shifts in auditory feedback, we compared variabilities in the second vocalizations (with FF shifts) with the  
159 first one (no shifts). We found significantly larger variability in  $\pm 100$ -cent shift conditions for the slow  
160 component (**Fig. 3A**; paired-t test,  $t(39) = -8.73$ ,  $p < 0.001$ ;) but not for the fast component (**Fig. 3C**; paired-t  
161 test,  $t(39) = -0.24$ ,  $p = 0.814$ ). The variability difference of the second from the first vocalization increased  
162 according to the amount of FF shift for the slow component (**Fig. 3B**), but remained constant around zero for  
163 the fast one (**Fig. 3D**). These results showed that the compensatory FF changes contain the same ranges in  
164 modulation frequencies with the slow component of spontaneously generated vocal variability (i.e., without  
165 FF shifts in auditory feedback). Further, we calculated the 2nd-1st variability difference in each of the  
166 subbands derived by the modulation filter bank to confirm the modulation frequency of the compensatory FF  
167 movement. The result (**Fig. 3E**) clearly depicted that the slow modulation component, which is associated  
168 with the compensation ratio in the spontaneous fluctuation (**Fig. 2F**), exhibited an extra variability for the  
169 compensatory vocal responses. This coincident finding strongly supported the idea that spontaneous  
170 variability in the slow components plays a critical role in the compensation.

171

#### 172 Compensation ratio decreased with large FF shift

173 The motor exploration hypothesis predicts that the amount of compensation becomes small when the induced  
174 shift is large. For example, with a certain amount of variability, the originally intended FF will not be  
175 overlapped well with largely shifted versions of the FF distribution that reflects the motor exploration range  
176 (**Fig. 4A**). This can reduce opportunities to find correct (intended) FF during vocalization, and hence, decrease  
177 the compensation ratio for such large shifts. We tested this possibility by calculating the compensation ratio  
178 for each of the three shift amounts (**Fig. 4BC**). We pooled positive and negative shifts with inverting its sign.  
179 We statistically compared the compensation ratios among three conditions, and found significant difference  
180 between 50- and 100-cent shifts (**Fig. 4C**; Wilcoxon's signed-rank test with Bonferroni correction;  $z = 3.48$ ,  
181  $p = 0.002$ ), but not between 25- and 50-cent ( $z = -0.15$ ,  $p = 1.000$ ) or between 25- and 100-cent ( $z = 2.26$ ,  $p =$   
182  $0.072$ ). While the compensation ratio in 100-cent shifts was significantly lower than others, its correlation  
183 with the variability of the slow component was still significant (**Fig. 4D**;  $r_s = 0.40$ ,  $n = 38$ ,  $p = 0.013$ ). These  
184 results consistently supported the motor exploration hypothesis in vocal control.

185

#### 186 Influence of perception and other factors

187 We additionally assessed other factors that potentially affect the compensation process, such as perceptual  
188 ability to discriminate vocal pitch. For this aim, we estimated participant's ability to detect the FF shifts  
189 induced in recorded own voices using a dataset from the listening tests performed in our previous study (Xu et  
190 al., 2020). In this test, participants were asked to answer whether any pitch modification occurred in the  
191 second vocalization comparing with the first one in each trial (**Fig. 5A**). We estimated the discrimination  
192 threshold and accuracy for detecting the presence of pitch modification by fitting a sigmoid curve (**Fig. 5B**) on



193 the detection rate dataset (see Method for details). Obtained discrimination thresholds and accuracies ranged  
194 26.91–108.25 ( $54.71 \pm 16.69$ ) cents and 0.87–38.30 ( $14.13 \pm 11.48$ ) cents, respectively. We then tested  
195 correlations between these perceptual properties and the compensation ratio. The result showed that the  
196 compensation ratio did not significantly correlate with both the discrimination threshold ( $r_s = -0.17$ ,  $n = 38$ ,  
197  $p = 0.298$ ; **Fig. 5C**) or accuracy ( $r_s = 0.18$ ,  $n = 38$ ,  $p = 0.287$ ; **Fig. 5D**), suggesting that the perceptual ability  
198 did not contribute the compensation in this case. Moreover, we tested if the amplitude of vocalization (or  
199 loudness level of auditory feedback) affected the compensation ratio. However, the relative amplitude level  
200 was not significantly correlated with the compensation ratio ( $r_s = 0.07$ ,  $n = 38$ ,  $p = 0.685$ ; **Fig. S1D**). Lastly,  
201 we performed a stepwise multiple regression analysis to find the most effective model to explain the variation  
202 of the compensation ratio, amongst five explanatory variables: variability in slow and fast components,  
203 discrimination threshold, accuracy, and voice amplitude. The analysis best chose a statistical model that  
204 contained only the variability in slow component as an explanatory variable (adjusted  $R^2 = 0.12$ ,  $df = 36$ ,  $SSE$   
205  $= 0.168$ ,  $p = 0.019$ ), indicating that the slow component is the main contributor for predicting the  
206 compensation ratio.

207

## 208 **Discussion**

209 Recent debates on tight links between motor variability and adaptive regulation have been along with the  
210 motor exploration hypothesis, with showing practical evidence in songbirds' vocalization (Tumer and  
211 Brainard, 2007; Andalman and Fee, 2009; Sober and Brainard, 2009, 2012; Charlesworth et al., 2011;  
212 Kuebrich and Sober, 2015), and in some other motor actions of humans (Wu et al., 2014) or rodents (Dhawale  
213 et al., 2019). Here, we provide further evidence for this debate in human vocalizations by demonstrating that  
214 the spontaneous FF variability is positively correlated with the rate of compensatory response against FF shift  
215 perturbations induced in the auditory feedback (**Fig. 2A**). This result was consistent with a previous study that  
216 used sudden FF shifts in the auditory feedback in the middle of vocalization (Scheerer and Jones, 2012),  
217 suggesting robustness of the finding against methodological differences. Further analyses showed that the  
218 slowly fluctuating components but not the fast components had the greater impact on the compensatory  
219 response (**Fig. 2D,E**). In addition, the compensation ratio for the largest shift conditions (+100 cent) showed  
220 a significant decrease comparing to other shifts (**Fig. 4C**), even exhibiting the correlation with the  
221 spontaneous variability of slow component (**Fig. 4D**). These findings provide further support for the idea that  
222 spontaneously produced motor noise plays a role in generating motor explorations and results in promoting its  
223 adaptive regulation, even in vocal production processes.

224 Our results further indicated that the slow components of the spontaneous variability more contributed to  
225 the compensation than the fast fluctuation (**Fig. 2**), and the main component of the compensation response  
226 shared the same frequency range of the slow component (**Fig.3**). The fast fluctuation in vocal FF has been

227 recognized as “microtremor” which is an involuntary fluctuation caused by physical/physiological instability  
228 (Schoentgen, 2002), suggesting that this component mainly consists of uncontrollable noise sources generated  
229 in the peripheral system. Such peripherally derived variability may not be well suited for adaptation-related  
230 motor exploration because of its uncontrollable nature (Dhawale et al., 2017). In contrast, it is indicated that  
231 the slow component is controllable in the central nervous system because participants increased the amplitude  
232 of FF movement in the range of slow component for compensatory responses. Thus, our result is in  
233 concordance with the motor exploration hypothesis, suggesting that the spontaneous variability in slow  
234 fluctuation contributes to vocal adaptation by generating the motor exploration.

235 The present results well fit with the idea that variability in motor production contributes to learning by  
236 extending such exploration (Faisal et al., 2008; Renart and Machens, 2014; Wu et al., 2014; Dhawale et al.,  
237 2017), and provide further generality of this hypothesis in the vocal control. An alternative explanation for the  
238 variability-adaptation relationship could be possible based on a factor of the perceptual ability to detect FF  
239 changes. A previous study of vocal FF control reported that children who had less sensitive pitch  
240 discrimination abilities showed larger compensations in response to sudden induced FF shifts (Heller Murray  
241 and Stepp, 2020), suggesting a possible impact of the auditory ability on the compensation ratio. Although,  
242 our result of correlation analysis between perception and compensatory response (**Fig. 5**) did not support this  
243 idea since they were not significantly correlated. Thus, we here exclude the possibility of influence from  
244 auditory abilities, but employ the spontaneous variability as the main factor explaining the individual  
245 difference in the compensation ratio.

246 More generally, our study suggests a shared strategy in vocal adaptation mechanisms among songbirds  
247 and humans. Many studies have shown potential parallels in these two species in vocal learning behaviors and  
248 their neural circuitries (Doupe and Kuhl, 1999; Kuhl, 2004; Lipkind et al., 2013; Tchernichovski and Marcus,  
249 2014). Our results add further evidence of such parallels at the level of not only behavioral analogues, but also  
250 the computation for vocal adaptation. It should be noted that previous songbird studies have focused on  
251 variability and adaptation in a trial-by-trial manner where researchers assessed updating changes in vocal  
252 acoustics every song renditions (Kao et al., 2005; Tumer and Brainard, 2007; Sober and Brainard, 2012;  
253 Kuebrich and Sober, 2015; Tachibana et al., 2017), although several studies have shown the importance of  
254 within-trial variability, i.e., FF fluctuations in one vocal element, on vocal adaptations (Charlesworth et al.,  
255 2011; Kojima et al., 2018). Our study here demonstrated the relationship between variability and  
256 compensatory responses within each trial in human vocalization, while the relationship between the  
257 trial-by-trial variability and updating adaptation over trials will be tested in future studies.

258



## 259 **Methods**

### 260 Dataset

261 The dataset used here was originally obtained in our previous study (Xu et al., 2020). The present study  
262 analyzed this in different ways to elucidate the relationship between the variability and compensation behavior  
263 in vocal control, although the previous study had focused on the influences of perceptual awareness and vocal  
264 responses against manipulating different acoustical features in the auditory feedback. The data were obtained  
265 from forty university students (20 females; 18-26 years old) without any experience of formal music training.  
266 The experiment was approved by the Human Subjects Ethics Committee of Tokyo Metropolitan University.

267 The experimental procedure was identical as described in the previous study. In brief, participants were  
268 asked to produce isolated vowels /a/ or /u/ according to the letter displayed on a computer screen with hearing  
269 auditory feedback via headphones. The auditory feedback was modified by a voice processor (Voice  
270 Worksplus, TC Helicon Vocal Technologies, Victoria BC, Canada), and feedbacked to participants with  
271 masking pink noise. Participants vocalized twice the same vowel for 2 s with 1 s intermission in each trial, and  
272 only the second voice was modified in its feedback (**Fig. 1A**). There was a total of 13 conditions for the  
273 second vocalization: 6 for spectral shifts, 6 for spectral-envelope shifts, and 1 for no shift as a control  
274 condition. In the spectral shift conditions, the voice spectrum was linearly expanded by  $\pm 25$ ,  $\pm 50$ , or  $\pm 100$   
275 cents (100 cents = 1 semitone), resulting in the shift of the fundamental frequency (FF). The spectral-envelope  
276 shift conditions expanded only the envelope by  $\pm 3$ ,  $\pm 6$ , or  $\pm 12$  percent without changing FF. There were 10  
277 trials for each of the 13 conditions for each vowel. The order of 260 trials was pseudo-randomized. Note that  
278 we only focused on vocal responses in the spectral shift conditions, but the spectral-envelope shift conditions  
279 were excluded from the further analyses in this study. We mainly analyzed the dataset for /a/-vowel trials since  
280 the compensatory responses for this vowel was clearer than that for /u/ trials (see **Supporting Information**).  
281 After vocalization sessions, participants were also asked to detect whether the modifications had been applied  
282 to recorded own voices that were feedbacked to them during the vocalization session. In this listening test,  
283 voices in two representative trials were played back to each participant. The participant was asked if they  
284 could perceive a change in pitch and/or timbre in the second vocalization comparing with the first one. The  
285 present study used these responses to assess the participant's perceptual ability for detecting the presence of  
286 FF shifts in the feedbacked voice.

287

### 288 Preprocessing

289 The FF of vocal sound was calculated by Praat 6.0 (Boersma and Weenink, 2017). The FF calculation was  
290 performed by an adapted auto-correlation method implemented in the Praat ("To Pitch (ac)"), with 10-ms step,  
291 40-ms window, and frequency boundaries between 75 Hz and 600 Hz. The extracted FF traces were converted  
292 into cent values that were in logarithmic scale and obtained as follows:  $1200 \log_2(f/f_{base})$ , where  $f$  is FF in

293 Hz, and  $f_{base}$  is a base frequency (we used 55 Hz for the base).

294 We preprocessed the obtained dataset in two steps: alignment and refinement, as described below. We  
295 firstly aligned the data by time points of vocal onsets. In this process, the vocal onset and offset were detected  
296 from the amplitude envelopes (described below) with a threshold of the background level + 30 dB. The  
297 background level was estimated from silent parts of recordings for each participant. Then, we refined the  
298 aligned data by detaching or repairing unstable/misdetected data points as follows. Fragmented data points  
299 were connected by filling brief temporal gaps ( $\leq 40$  ms) and removing short fragments ( $\leq 50$  ms). Unrealistic  
300 frequency jumps that were larger than  $\pm 100$  cents at the beginning part of vocalization were searched  
301 backward from 200-ms time point to the onset, and removed. Similarly, unrealistic jumps for the ending parts  
302 were also removed by forwardly searching from 300-ms before the offset with the same threshold ( $\pm 100$   
303 cents). After these removals of unstable onset parts, we re-define new onset times as the beginning point of  
304 stable vocalization since these unstable data reflected harsh or aperiodic glottal pulsation in which participants  
305 could not sense FF shifts in the feedback. Additionally, we also repaired the unrealistic jumps at the middle  
306 part of vocalization between 210 to 1500 ms from the vocal onset (filled with the value obtained immediately  
307 before the jump).

308

### 309 Compensation ratio

310 To quantify compensatory responses against artificial FF shifts in the auditory feedback, we first removed  
311 participant-specific frequency changes that were unrelated to the response to FF shifts. For this, a common  
312 trend in all trajectories for each participant was removed by subtracting the grand mean of all trials. Moreover,  
313 we set the beginning part of each vocalization as zero by subtracting the mean value within a range of  
314 50–150 ms in each trial to measure only the responses to FF shifts. We defined this subtraction baseline period  
315 by visual inspection of outcomes of the grand averaging, and excluded the first 50 ms because of its instability.  
316 Then, we calculated the mean value of the late part (800–1200 ms) of data, in which the trajectories fluctuated  
317 less and were relatively stable (shown as a black bar in **Fig. 1B**). We defined the compensation ratio to  
318 quantify the ratio how much the participant compensated own vocal FF against induced FF shifts. This ratio  
319 was calculated as a sign-inverted slope of a line (linear regression) fitted to the mean amounts of vocal  
320 responses as a function of FF shifts (**Fig. 1C**).

321

### 322 Variability assessment

323 To quantify the motor variability in vocalization, we calculated the standard deviation (SD) of the FF within a  
324 period between 100 and 1200 ms after the voice onset. For this calculation, we collected FF trajectory data of  
325 the first vocalization of each trial, in which no FF shift was presented. We excluded data from trials that  
326 followed immediately after the spectral-shifted (and thus FF-shifted) trials to avoid contaminations of possible  
327 aftereffects. The computed SDs were averaged for each participant to obtain a variability index from the

328 original (or “whole”) FF trajectories. Then, we computed the mean SD after filtering by a low-pass filter with  
329 5-Hz cutoff, or a band-pass filter with 6–30-Hz bandwidth (second-order Butterworth filter) to obtain the  
330 variability index for a slowly fluctuating component (“slow”) or fast fluctuating one (“fast”), respectively.  
331 These two frequency bands were defined by visual inspection of the modulation spectrum (**Fig. 2B**). Before  
332 filtering, each trajectory was zero-centered by subtracting the mean value to remove the constant component,  
333 and filled missing data points with zero. We used the zero-phase digital filtering implemented in MATLAB  
334 software (“filtfilt” function).

335

### 336 Modulation spectrum analysis

337 For assessing a relative amplitude across different modulation frequencies, we calculated the modulation  
338 spectrum by a half-octave-band filter bank. We first upsampled each FF trajectory into a double rate (200 Hz),  
339 then, performed centering by subtracting the mean value of it, and filled missing data points with zero. We  
340 defined the filter bank as a set of multiple band-pass filters that had 1/2-octave bandwidths with center  
341 frequencies equally spaced at 1/4-octave step from 0.4 to 50 Hz (second-order Butterworth filter). The  
342 amplitude of each subband was calculated as the root-mean-square value of the filtered trajectory.

343

### 344 Amplitude calculation

345 The amplitude envelope of each vocalization was calculated as the root-mean-square (RMS) values of an  
346 A-weighted waveform within 40-ms Hanning window for every 10-ms time step by MATLAB software. The  
347 obtained amplitude envelope was converted into a logarithmic scale (dB) by a formula:  $20 \log_{10}(x)$ . We  
348 calculated the average value of the log-converted amplitude within a period (150-1200ms) that includes the  
349 very beginning part of the compensatory response and the plateau part of vocalization. Then, relative values  
350 were calculated by subtracting an overall average from all participants’ data.

351

### 352 Discrimination performance

353 We quantified the participant’s perceptual ability to detect shifts in own vocal FF using the dataset obtained  
354 from the listening test performed after vocalization sessions. We pooled trials irrespective of FF shift  
355 directions (minus or plus), and two vowels (/a/ and /u/) to increase the resolution and obtained 8 repetitions (2  
356 directions  $\times$  2 vowels  $\times$  2 trials) for each of absolute amounts of FF shifts. The detection rate for each absolute  
357 FF shift was approximated by fitting a sigmoid function. For this fitting, we used a cumulative probability  
358 density function of the normal distribution as the sigmoid. The absolute shift value at 50 % detection rate and  
359 the shallowness of fitted sigmoid, which were corresponding to the mean and standard deviation of the  
360 cumulative normal distribution, were defined as the discrimination threshold and accuracy, respectively (**Fig.**  
361 **3B**).

362

363

## 364 **Acknowledgement**

365 We thank to Drs. Satoshi Kojima, Kouta Kanno, Kentaro Ono for valuable comments on the earlier version of  
366 this manuscript. This study was supported by Adolescent Mind & Self-Regulation, Grant-in-Aid for Scientific  
367 Research on Innovative Areas, MEXT, Japan (#23118003; Adolescent Mind & Self-Regulation) to R.H. and  
368 F.H., Grant-in-Aid for Scientific Research on Innovative Areas, MEXT, Japan (#4903; Evolinguistics) to K.O.,  
369 MEXT/JSPS KAKENHI Grant No. 16H06525 to F.H., 16H06395 and 16H06396 to R.H., and JSPS  
370 Postdoctoral Fellowship, Japan (#269362) to R.O.T.

371

## 372 **Reference**

- 373 Akagi M, Iwaki M, Minakawa T (1998) Fundamental frequency fluctuation in continuous vowel utterance and its  
374 perception. In: 5th International Conference on Spoken Language Processing, pp 1519–1522 Available at:  
375 [https://www.isca-speech.org/archive/icslp\\_1998/i98\\_0027.html](https://www.isca-speech.org/archive/icslp_1998/i98_0027.html).
- 376 Akagi M, Kitakaze H (2000) Perception of synthesized singing voices with fine fluctuations in their fundamental  
377 frequency contours. In: 6th International Conference on Spoken Language Processing, pp 458–461 Available at:  
378 [https://www.isca-speech.org/archive/icslp\\_2000/i00\\_3458.html](https://www.isca-speech.org/archive/icslp_2000/i00_3458.html).
- 379 Andalman AS, Fee MS (2009) A basal ganglia-forebrain circuit in the songbird biases motor output to avoid vocal errors.  
380 Proc Natl Acad Sci U S A 106:12518–12523 Available at:  
381 <http://www.pubmedcentral.nih.gov/articlerender.fcgi?artid=2709669&tool=pmcentrez&rendertype=abstract>.
- 382 Boersma P, Weenink D (2017) Praat: doing phonetics by computer. Available at: <http://www.praat.org/>.
- 383 Burnett TA, Freedland MB, Larson CR, Hain TC (1998) Voice F0 responses to manipulations in pitch feedback. J  
384 Acoust Soc Am 103:3153–3161 Available at: <http://www.ncbi.nlm.nih.gov/pubmed/9637026> [Accessed April 20,  
385 2014].
- 386 Charlesworth JD, Tumer EC, Warren TL, Brainard MS (2011) Learning the microstructure of successful behavior. Nat  
387 Neurosci 14:373–380 Available at: <http://dx.doi.org/10.1038/nn.2748> [Accessed March 23, 2014].
- 388 Dhawale AK, Miyamoto YR, Smith MA, Ölveczky BP (2019) Adaptive Regulation of Motor Variability. Curr Biol  
389 29:3551–3562.e7 Available at: <https://linkinghub.elsevier.com/retrieve/pii/S0960982219311029>.
- 390 Dhawale AK, Smith MA, Ölveczky BP (2017) The Role of Variability in Motor Learning. Annu Rev Neurosci  
391 40:479–498 Available at: <http://www.annualreviews.org/doi/10.1146/annurev-neuro-072116-031548>.
- 392 Doupe AJ, Kuhl PK (1999) Birdsong and human speech: common themes and mechanisms. Annu Rev Neurosci  
393 22:567–631 Available at: <http://www.ncbi.nlm.nih.gov/pubmed/10202549> [Accessed June 11, 2014].

- 394 Elman JL (1981) Effects of frequency-shifted feedback on the pitch of vocal productions. *J Acoust Soc Am* 70:45  
395 Available at: <http://www.ncbi.nlm.nih.gov/pubmed/7264071> [Accessed April 26, 2016].
- 396 Faisal AA, Selen LPJ, Wolpert DM (2008) Noise in the nervous system. *Nat Rev Neurosci* 9:292–303 Available at:  
397 <http://www.nature.com/articles/nrn2258>.
- 398 Hahnloser RHR, Narula G (2017) A Bayesian Account of Vocal Adaptation to Pitch-Shifted Auditory Feedback.  
399 Vasilaki E, ed. *PLoS One* 12:e0169795 Available at: <http://dx.plos.org/10.1371/journal.pone.0169795> [Accessed  
400 March 29, 2017].
- 401 Hain TC, Burnett T a, Kiran S, Larson CR, Singh S, Kenney MK (2000) Instructing subjects to make a voluntary  
402 response reveals the presence of two components to the audio-vocal reflex. *Exp brain Res* 130:133–141 Available  
403 at: <http://www.ncbi.nlm.nih.gov/pubmed/10672466>.
- 404 Hampton CM, Sakata JT, Brainard MS (2009) An avian basal ganglia-forebrain circuit contributes differentially to  
405 syllable versus sequence variability of adult Bengalese finch song. *J Neurophysiol* 101:3235–3245 Available at:  
406 <http://www.pubmedcentral.nih.gov/articlerender.fcgi?artid=2694116&tool=pmcentrez&rendertype=abstract>  
407 [Accessed March 23, 2014].
- 408 Heller Murray ES, Stepp CE (2020) Relationships between vocal pitch perception and production: a developmental  
409 perspective. *Sci Rep* 10:3912 Available at: <http://www.nature.com/articles/s41598-020-60756-2>.
- 410 Howes P, Callaghan J, Davis P, Kenny D, Thorpe W (2004) The relationship between measured vibrato characteristics  
411 and perception in Western operatic singing. *J Voice* 18:216–230 Available at:  
412 <https://linkinghub.elsevier.com/retrieve/pii/S0892199703001425>.
- 413 Kao MH, Brainard MS (2006) Lesions of an avian basal ganglia circuit prevent context-dependent changes to song  
414 variability. *J Neurophysiol* 96:1441–1455 Available at: <http://www.ncbi.nlm.nih.gov/pubmed/16723412> [Accessed  
415 March 23, 2014].
- 416 Kao MH, Doupe AJ, Brainard MS (2005) Contributions of an avian basal ganglia-forebrain circuit to real-time  
417 modulation of song. *Nature* 433:638–643 Available at: <http://www.ncbi.nlm.nih.gov/pubmed/15703748>.
- 418 Kawahara H (1994) Interactions between speech production and perception under auditory feedback perturbations on  
419 fundamental frequencies. *J Acoust Soc Japan* 15:201–202 Available at:  
420 [https://www.jstage.jst.go.jp/article/ast1980/15/3/15\\_3\\_201/\\_article](https://www.jstage.jst.go.jp/article/ast1980/15/3/15_3_201/_article) [Accessed April 26, 2016].
- 421 Kojima S, Kao MH, Doupe AJ, Brainard MS (2018) The avian basal ganglia are a source of rapid behavioral variation  
422 that enables vocal motor exploration. *J Neurosci*.
- 423 Kuebrich BD, Sober SJ (2015) Variations on a theme: Songbirds, variability, and sensorimotor error correction.  
424 *Neuroscience* 296:48–54 Available at: <http://www.ncbi.nlm.nih.gov/pubmed/25305664> [Accessed November 8,

- 425 2014].
- 426 Kuhl PK (2004) Early language acquisition: cracking the speech code. *Nat Rev Neurosci* 5:831–843 Available at:  
427 <http://www.ncbi.nlm.nih.gov/pubmed/15496861> [Accessed June 11, 2011].
- 428 Larson CR, Burnett T a, Kiran S, Hain TC (2000) Effects of pitch-shift velocity on voice F<sub>0</sub> responses. *J Acoust Soc Am*  
429 107:559–564 Available at: <http://www.ncbi.nlm.nih.gov/pubmed/10641664>.
- 430 Lipkind D, Marcus GF, Bemis DK, Sasahara K, Jacoby N, Takahasi M, Suzuki K, Feher O, Ravbar P, Okanoya K,  
431 Tchernichovski O (2013) Stepwise acquisition of vocal combinatorial capacity in songbirds and human infants.  
432 *Nature* 498:104–108 Available at:  
433 <http://www.pubmedcentral.nih.gov/articlerender.fcgi?artid=3676428&tool=pmcentrez&rendertype=abstract>  
434 [Accessed October 8, 2014].
- 435 Liu H, Larson CR (2007) Effects of perturbation magnitude and voice F<sub>0</sub> level on the pitch-shift reflex. *J Acoust Soc Am*  
436 122:3671–3677.
- 437 Liu P, Chen Z, Larson CR, Huang D, Liu H (2010) Auditory feedback control of voice fundamental frequency in school  
438 children. *J Acoust Soc Am* 128:1306–1312 Available at: <http://www.ncbi.nlm.nih.gov/pubmed/20815465>  
439 [Accessed November 8, 2014].
- 440 Olveczky BP, Gardner TJ (2011) A bird’s eye view of neural circuit formation. *Curr Opin Neurobiol* 21:124–131  
441 Available at:  
442 <http://www.pubmedcentral.nih.gov/articlerender.fcgi?artid=3041870&tool=pmcentrez&rendertype=abstract>  
443 [Accessed June 24, 2011].
- 444 Prather J, Okanoya K, Bolhuis JJ (2017) Brains for birds and babies: Neural parallels between birdsong and speech  
445 acquisition. *Neurosci Biobehav Rev* Available at: <http://www.ncbi.nlm.nih.gov/pubmed/28087242> [Accessed  
446 February 28, 2017].
- 447 Renart A, Machens CK (2014) Variability in neural activity and behavior. *Curr Opin Neurobiol* 25C:211–220 Available  
448 at: <http://www.sciencedirect.com/science/article/pii/S0959438814000488> [Accessed April 29, 2014].
- 449 Saitou T, Unoki M, Akagi M (2005) Development of an F<sub>0</sub> control model based on F<sub>0</sub> dynamic characteristics for  
450 singing-voice synthesis. *Speech Commun* 46:405–417 Available at:  
451 <http://linkinghub.elsevier.com/retrieve/pii/S0167639305000993>.
- 452 Scheerer NE, Jones JA (2012) The relationship between vocal accuracy and variability to the level of compensation to  
453 altered auditory feedback. *Neurosci Lett* 529:128–132 Available at:  
454 <http://www.ncbi.nlm.nih.gov/pubmed/22995182> [Accessed November 8, 2014].
- 455 Schoentgen J (2002) Modulation frequency and modulation level owing to vocal microtremor. *J Acoust Soc Am*



- 456 112:690–700 Available at: <http://asa.scitation.org/doi/10.1121/1.1492820>.
- 457 Shipp T, Sundberg J, Doherty ET (1988) The effect of delayed auditory feedback on vocal vibrato. *J Voice* 2:195–199  
458 Available at: <https://linkinghub.elsevier.com/retrieve/pii/S0892199788800766>.
- 459 Sober SJ, Brainard MS (2009) Adult birdsong is actively maintained by error correction. *Nat Neurosci* 12:927–931  
460 Available at: <http://dx.doi.org/10.1038/nn.2336> [Accessed March 26, 2014].
- 461 Sober SJ, Brainard MS (2012) Vocal learning is constrained by the statistics of sensorimotor experience. *Proc Natl Acad Sci U S A* 109:21099–21103 Available at:  
462 <http://www.pubmedcentral.nih.gov/articlerender.fcgi?artid=3529072&tool=pmcentrez&rendertype=abstract>  
463 [Accessed March 23, 2014].
- 464
- 465 Sundberg J (1987) *The Science of the Singing Voice*. Northern Illinois University Press. Available at:  
466 <https://books.google.co.jp/books?id=iYGNQgAACAAJ>.
- 467 Tachibana RO, Takahasi M, Hessler NA, Okanoya K (2017) Maturation-dependent control of vocal temporal plasticity in  
468 a songbird. *Dev Neurobiol* 77:995–1006 Available at: <http://doi.wiley.com/10.1002/dneu.22487> [Accessed  
469 February 13, 2017].
- 470 Tchernichovski O, Marcus G (2014) Vocal learning beyond imitation: Mechanisms of adaptive vocal development in  
471 songbirds and human infants. *Curr Opin Neurobiol* 28:42–47 Available at:  
472 <http://dx.doi.org/10.1016/j.conb.2014.06.002>.
- 473 Tumer EC, Brainard MS (2007) Performance variability enables adaptive plasticity of “crystallized” adult birdsong.  
474 *Nature* 450:1240–1244 Available at: <http://www.ncbi.nlm.nih.gov/pubmed/18097411> [Accessed March 23, 2014].
- 475 Woolley SC, Kao MH (2015) Variability in action: Contributions of a songbird cortical-basal ganglia circuit to vocal  
476 motor learning and control. *Neuroscience* 296:39–47 Available at: <http://www.ncbi.nlm.nih.gov/pubmed/25445191>  
477 [Accessed December 8, 2014].
- 478 Wu HG, Miyamoto YR, Gonzalez Castro LN, Ölveczky BP, Smith MA (2014) Temporal structure of motor variability is  
479 dynamically regulated and predicts motor learning ability. *Nat Neurosci* 17:312–321 Available at:  
480 <http://www.pubmedcentral.nih.gov/articlerender.fcgi?artid=PMC4442489> [Accessed July 22, 2014].
- 481 Xu M, Tachibana RO, Okanoy K, Hagiwara H, Hashimoto R, Homae F (2020) Unconscious and distinctive control of  
482 vocal pitch and timbre during altered auditory feedback. *Front Psychol*.
- 483
- 484

485 **Figures**

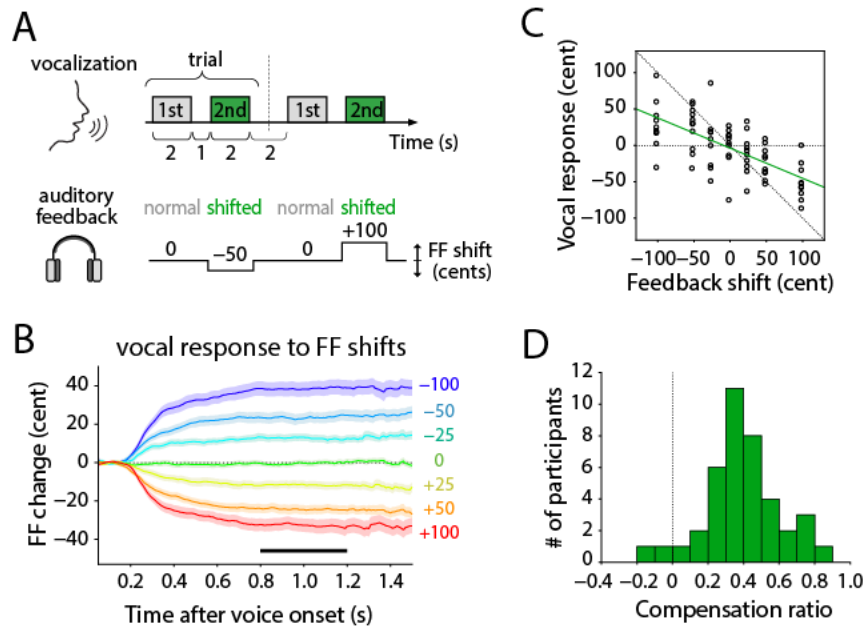

486  
487

488 **Figure 1.** Measuring compensation responses in vocal fundamental frequency (FF) against artificially induced  
489 FF shifts in auditory feedback. **A.** Schematic drawing of the experimental design. Participants vocalized twice  
490 in one trial with normal auditory feedback for the first time, and with modified auditory feedback in the  
491 second time. **B.** Average of vocal FF change across all participants in response to seven conditions of the FF  
492 shift in auditory feedback (0,  $\pm 25$ ,  $\pm 50$ , or  $\pm 100$  cents). All trajectories were aligned at vocal onsets, and  
493 detrended before averaging (see Methods for detail). Pale-colored area indicates the standard error ( $n = 40$ ). **C.**  
494 Example of compensation amounts as a function of FF shifts obtained from one participant (M04). Each dot  
495 indicates the compensation amount of each trial, which was calculated as an average of the plateau period  
496 (0.8–1.2 s after voice onset) indicated as a black bar in panel B. The compensation ratio was estimated as a  
497 sign-inverted value of the slope of fitted line, shown as a green line. Diagonal dotted line indicates  
498 sign-inverted unity slope **D.** Histogram of compensation ratios obtained from all participants.

499

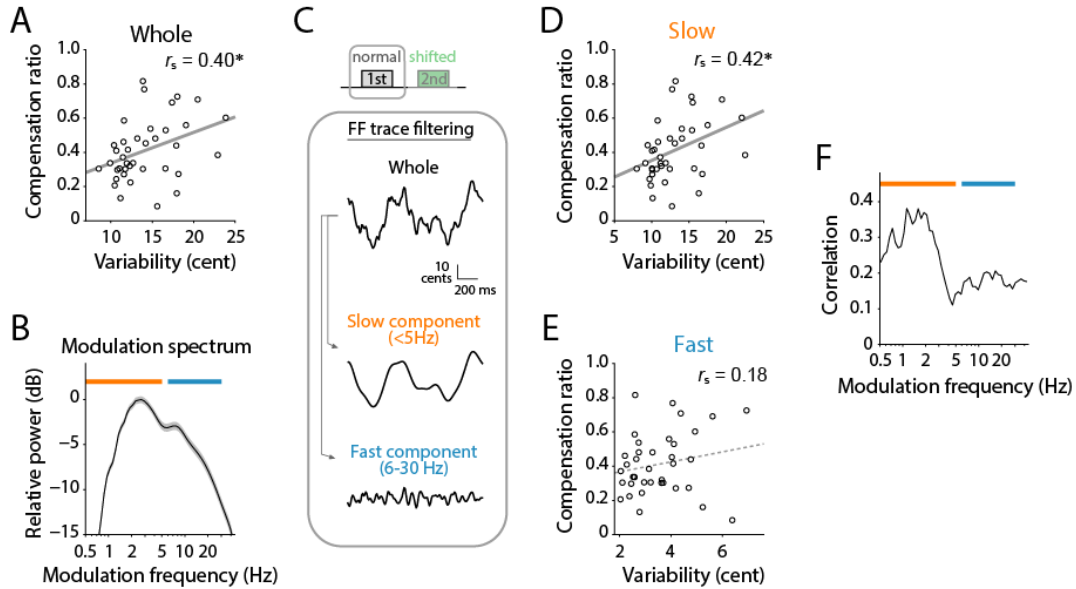

500

501

502 **Figure 2.** Spontaneous FF variability during vocalizations without modification in auditory feedback, and its  
 503 relationship with the compensation ratio. **A.** The relationship between the compensation ratio and variability  
 504 calculated from original (whole) FF trajectories during no FF shifts. Each circle indicates data from one  
 505 participant.  $r_s$  shows Spearman's signed-rank correlation coefficient. Two participants who showed negative  
 506 values in the compensation ratio were excluded as outliers. Asterisk (\*) indicates statistically significant  
 507 correlation ( $p < 0.05$ ). **B.** Modulation spectrum of spontaneous variation in vocal FF trajectories computed by  
 508 a 1/2-octave filter bank. Gray area indicates the standard error among 40 participants. Orange and blue lines  
 509 indicated frequency ranges of slow and fast fluctuation components. **C.** Examples of filtering on the original  
 510 FF trajectory (whole) to obtain the slow and fast fluctuation components (slow:  $<5$  Hz, fast: 6–30 Hz). **D,E.**  
 511 Correlation between the compensation ratio and variability of slow (D) or fast (E) fluctuation components,  
 512 respectively. **F.** Correlation coefficient (Spearman's) between the compensation ratio and the variability of  
 513 each modulation band as a function of center frequency of the half-octave filter bank.

514

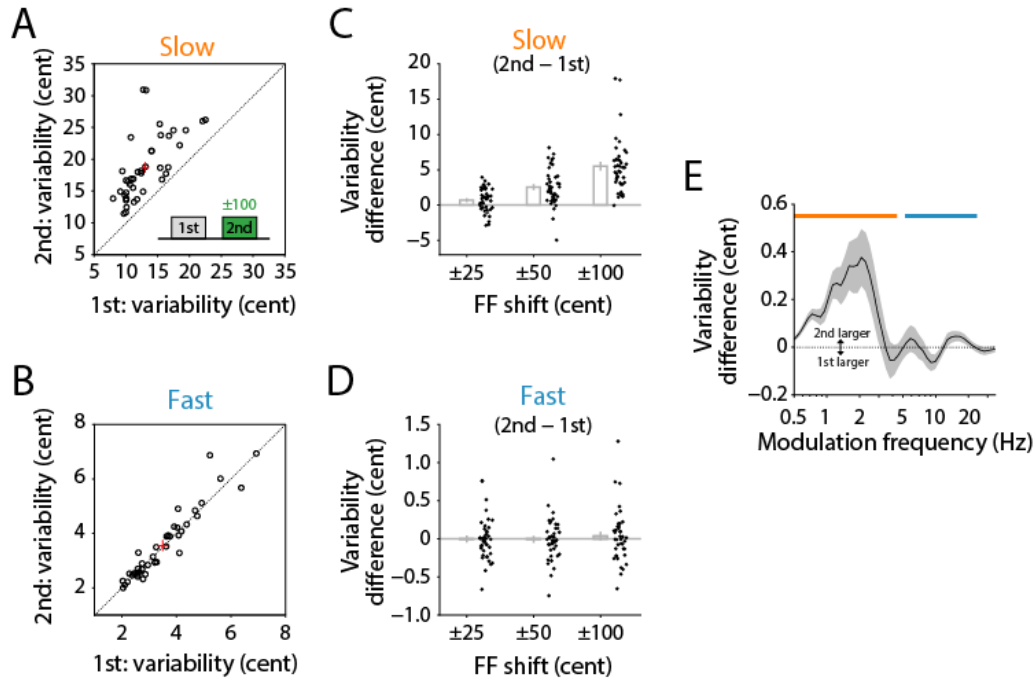

515

516

517 **Figure 3.** Variability comparison between the first (no FF shifts) and second (FF shifted) vocalization. **A,B.**  
518 Mean variability of the slow (A), and fast fluctuation (B) components in  $\pm 100$ -cent shift conditions of the  
519 second vocalization comparing to the first vocalization. Red crosshair indicates the mean and standard error.  
520 **C,D.** Variability difference of the slow (C) and fast (D) components in  $\pm 25$ -,  $\pm 50$ -, and  $\pm 100$ -cent shift  
521 conditions between the second and first vocalizations. Errorbar indicates the standard error among 40  
522 participants. **E.** Variability difference of each subband component obtained by the modulation filter bank in  
523  $\pm 100$ -cent shift conditions between the second and first vocalizations. Gray area indicates the standard error.  
524

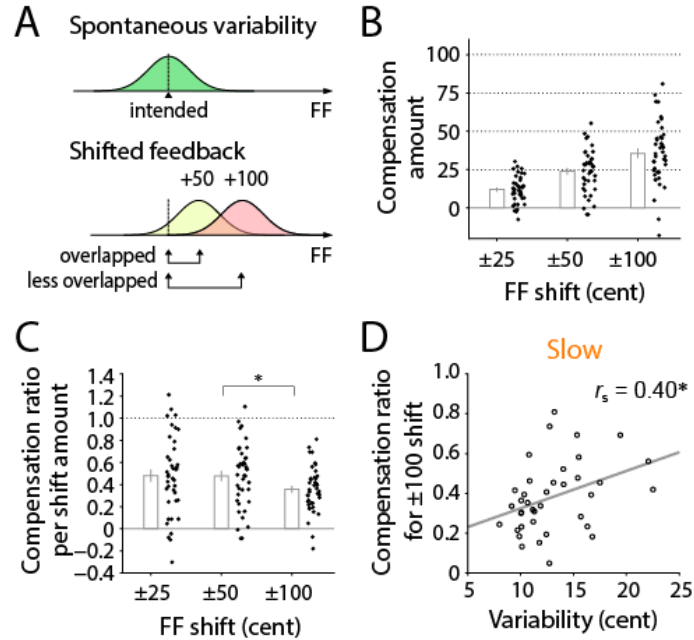

525

526

527 **Figure 4.** Decrease of compensation ratio for larger FF shifts. **A.** Schematic drawing of normalized  
528 distributions for the spontaneous FF variability (upper) and shifted versions of its feedback after the  
529 introduction of +50 and +100 cent shifts (lower). Given a certain amount of variability, originally intended FF  
530 will not be overlapped well with the distribution for large FF shifts, or will be outside of the motor exploration  
531 range. This can be expected to reduce the compensation ratio for that condition. **B.** Amount of compensatory  
532 responses against different amounts of FF shift (25, 50, and 100 cents). The vocal responses to positive FF  
533 shifts were sign-inverted and averaged with that to negative shift conditions. Each dot indicates individual  
534 participants. Error bar shows the standard error ( $n = 40$ ). **C.** Compensation ratio obtained for each shift  
535 amount. The value was calculated as dividing the compensation amount (shown in A) by the shift amount (25,  
536 50, or 100 cents). Asterisk (\*) indicates statistically significant difference ( $p < 0.05$ ; Bonferroni-corrected  
537 Wilcoxon's signed-rank test). **D.** Correlation between the compensation ratio for the 100-cent shift amount  
538 and the variability of the slow component.  $r_s$  shows Spearman's signed-rank correlation coefficient. Two  
539 participants who showed negative values in the compensation ratio were excluded as outliers. Asterisk (\*)  
540 indicates statistically significant correlation ( $p < 0.05$ ).

541

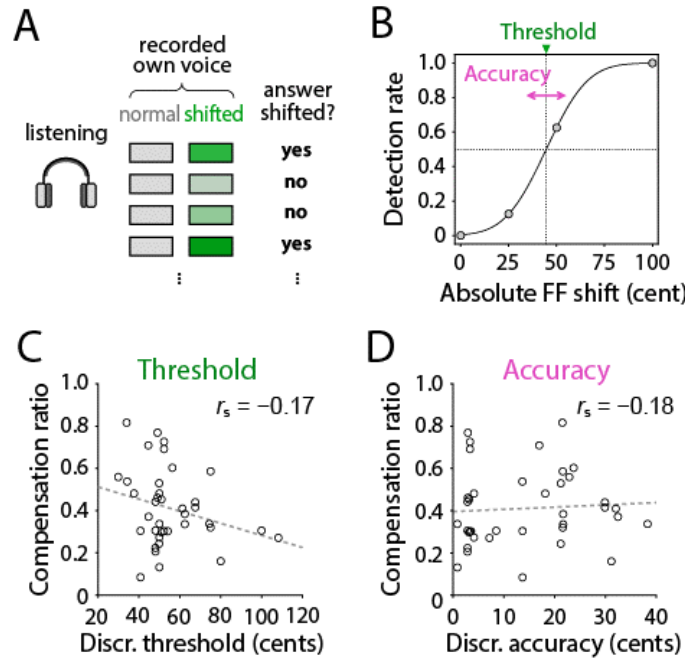

542

543

544

545

546

547

548

549

550

**Figure 5.** Participant's ability to detect the FF shifts in recorded own voices, and its correlation with the compensation ratio. **A.** Test procedure. Participants listened to a pair of recorded voices corresponding the first and second vocalization in each of vocalization trials, and judged whether the second one had the modification in pitch or not. **B.** Estimation of the discrimination threshold and accuracy by fitting a sigmoid function. **C,D.** Correlations of the compensation ratios with the discrimination threshold (C) and accuracy (D).  $r_s$  shows Spearman's signed-rank correlation coefficient.



## 551 Supporting Information

552 Article title: Spontaneous variability predicts adaptive motor response in vocal pitch control

553 Authors: Ryosuke O. Tachibana, Mingdi Xu, Ryu-ichiro Hashimoto, Fumitaka Homae, Kazuo Okanoya

554

555

556 Vowel difference

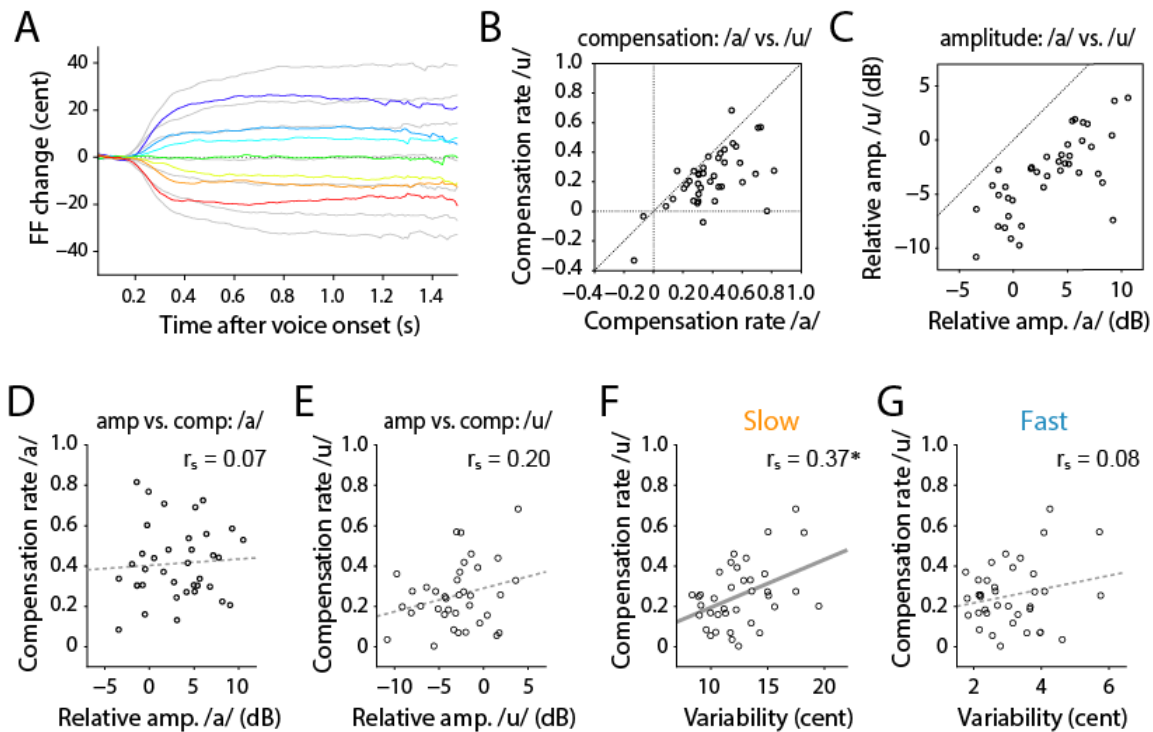

557

558

559 **Figure S1.** Vowel differences in compensation ratio, amplitude, and variability. **A.** Vocal responses against FF  
560 shifts in auditory feedback for /u/ vocalization (colored lines), showing that for /a/ trials as comparisons (gray  
561 lines). **B.** The compensation ratio for /u/ vocalizations was generally less than that for /a/. **C.** The voice  
562 amplitude of /u/ vowel was generally less than that of /a/. **D,E.** Voice amplitudes of /a/ (D) and /u/ (E) vowels  
563 did not show significant correlations with the compensation ratio. **F,G.** Correlation between the compensation  
564 ratio and variability of slow (F) or fast (G) components, respectively, for /u/ vocalizations. Asterisk (\*)  
565 indicates significant correlation ( $p < 0.05$ ).

566

567

568
